# Supplementary material
Source: PubMed Central journal article supplement (PMC2758805)
Supplement: supp_122_20_3749__8.pdf [file supp_122_20_3749__8.pdf]

**Table S1. List of oligonucleotides**

|     |                      |                                                                            |
|-----|----------------------|----------------------------------------------------------------------------|
| P1  | <b>Rab1h5'</b>       | AAA GGA TCC AGT CGA CAA CAA TGA GCA ACG<br>AGT ACG ATT ATC TG              |
| P2  | <b>Rab1h3'</b>       | AAA GGA TCC CTA CTG ACC GCA GCA ACC GCC                                    |
| P3  | <b>StoNFwd</b>       | TCC TCT GTT GGA AAA AAC TGT CTA CTT CTC<br>CGA TTC GC                      |
| P4  | <b>StoNRev</b>       | GCG AAT CGG AGA AGT AGA CAG TTT TTT CCA<br>ACA GAG GA                      |
| P5  | <b>QtoLFwd</b>       | GCA AAT TTG GGA TAC AGC TGG ACT GGA GCG<br>TTT CAG GAC C                   |
| P6  | <b>QtoLRev</b>       | GGT CCT GAA ACG CTC CAG TCC AGC TGT ATC<br>CCA AAT TTG C                   |
| P7  | <b>NtoIFwd</b>       | GAG TGT TTG CAA GCT GTT AAT CGG AAT CAA<br>GAA TGA TAT GG                  |
| P8  | <b>NtoIRev</b>       | CCA TAT CAT TCT TGA TTC CGA TTA ACA GCT<br>TGC AAA CAC TC                  |
| P9  | <b>D1-Fwd</b>        | ATG AGC AAC GAG TAC GAT TAT CTG TTC AAG<br>CTT TTG TTG ATC GGT G           |
| P10 | <b>D1-Rev</b>        | CTA CTG ACC GCA GCA ACC GCC ATT GTT CTG<br>TTG GAT TGG CTG AC              |
| P11 | <b>D1-3'UTR</b>      | TTA AAA AGG AAG TAA AAA AAG AGT CTC AGA<br>TAG TTT TGA TTA AAA CAT         |
| P12 | <b>Oligo dT</b>      | TAG GCG CGC CAA GCT TTT TTT TTT TTT TTT<br>TTT TTT                         |
| P13 | <b>D2a 5'UTRfor</b>  | ATC GCT CGC TGC TCT TCC TCC C                                              |
| P14 | <b>D2a 3'UTRrev</b>  | GAT ATT GCT AGG CTG GTC ACG TC                                             |
| P15 | <b>D2b attB1for</b>  | GGG GAC AAG TTT GTA CAA AAA AGC AGG CTT<br>CGA CGA TCG CTG AAT TGA CTG CCG |
| P16 | <b>Asc-polyA-D2b</b> | AAA AGG CGC GCC AAG GCA TTA AAG AGT GCT<br>CTA CAT TAT TTG CAT AAA AG      |
| P17 | <b>D2c attB1for</b>  | GGG GAC AAG TTT GTA CAA AAA AGC AGG CTT<br>CCG GTA GAT CGA TCC AGC TCC GAG |
| P18 | <b>Asc-polyA-D2c</b> | AAA AGG CGC GCC TAG GTG GGA CTT TTT ACT<br>A AA GAA GTT TAT TAA TAA TCC    |
| P19 | <b>GAPDH-F</b>       | CAC TTG AAG GGT GGT GCC AAG                                                |
| P20 | <b>GAPDH-R</b>       | CCT GTT GTC GCC AAC GAA GTC                                                |
| P21 | <b>SALK-SMR-LB1</b>  | TTT AGG GTT CCG ATT TAG TGC TTT ACG GCA<br>CCT CG                          |
| P22 | <b>Rab1b-TMRI</b>    | TTT TCA GTA AGA TCA GAC TTG TTT CCA ACA<br>AGG AG                          |
| P23 | <b>RabD2a-SALK</b>   | TAT CGG GGA TTC TGG CGT AGG CAA GTC TTG<br>TCT TC                          |
| P24 | <b>TMRI-LB1</b>      | GCC TTT TCA GAA ATG GAT AAA TAG CCT TGC<br>TTC C                           |
| P25 | <b>Oligo 101</b>     | ATC TAG TAT CTT TCA TAC TTG AGC G                                          |
| P26 | <b>Oligo 104</b>     | CGC ACA GTT GAG CAG GAC GG                                                 |
| P27 | <b>D2c-T-DNAfor</b>  | CTC CAG ATT GTA AGT TGT CTC GAC TAG                                        |
| P28 | <b>D2c-T-DNArev</b>  | CGC CAT TCT GCA AGA CAG AAT CCG                                            |
