# Supplementary material
Source: PubMed Central journal article supplement (PMC2758805)

A

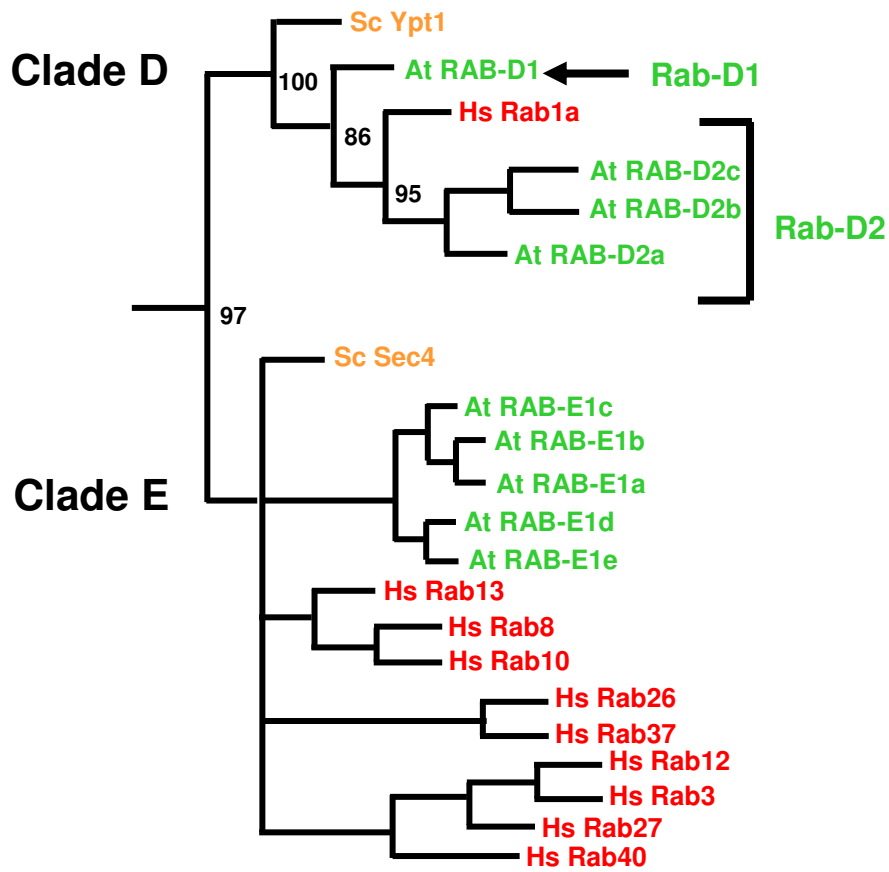

B

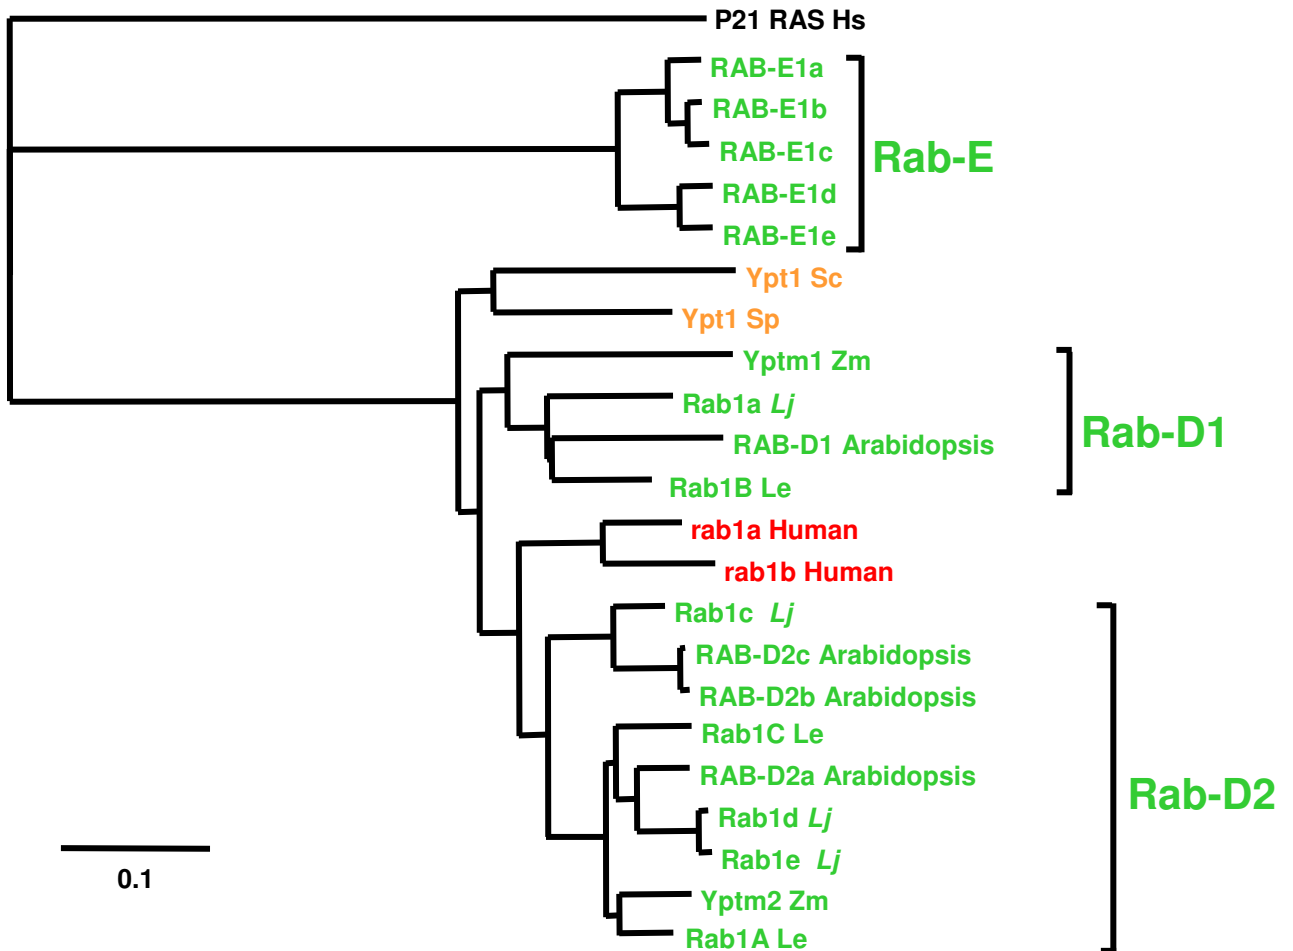

Supplement: supp_122_20_3749__1.pdf [file supp_122_20_3749__1.pdf]

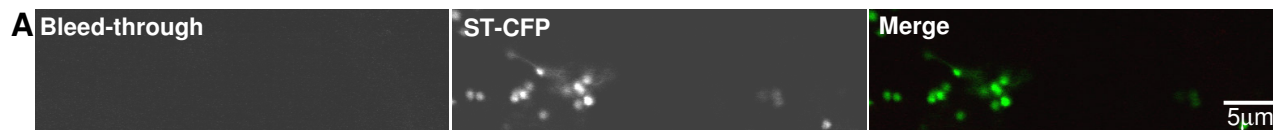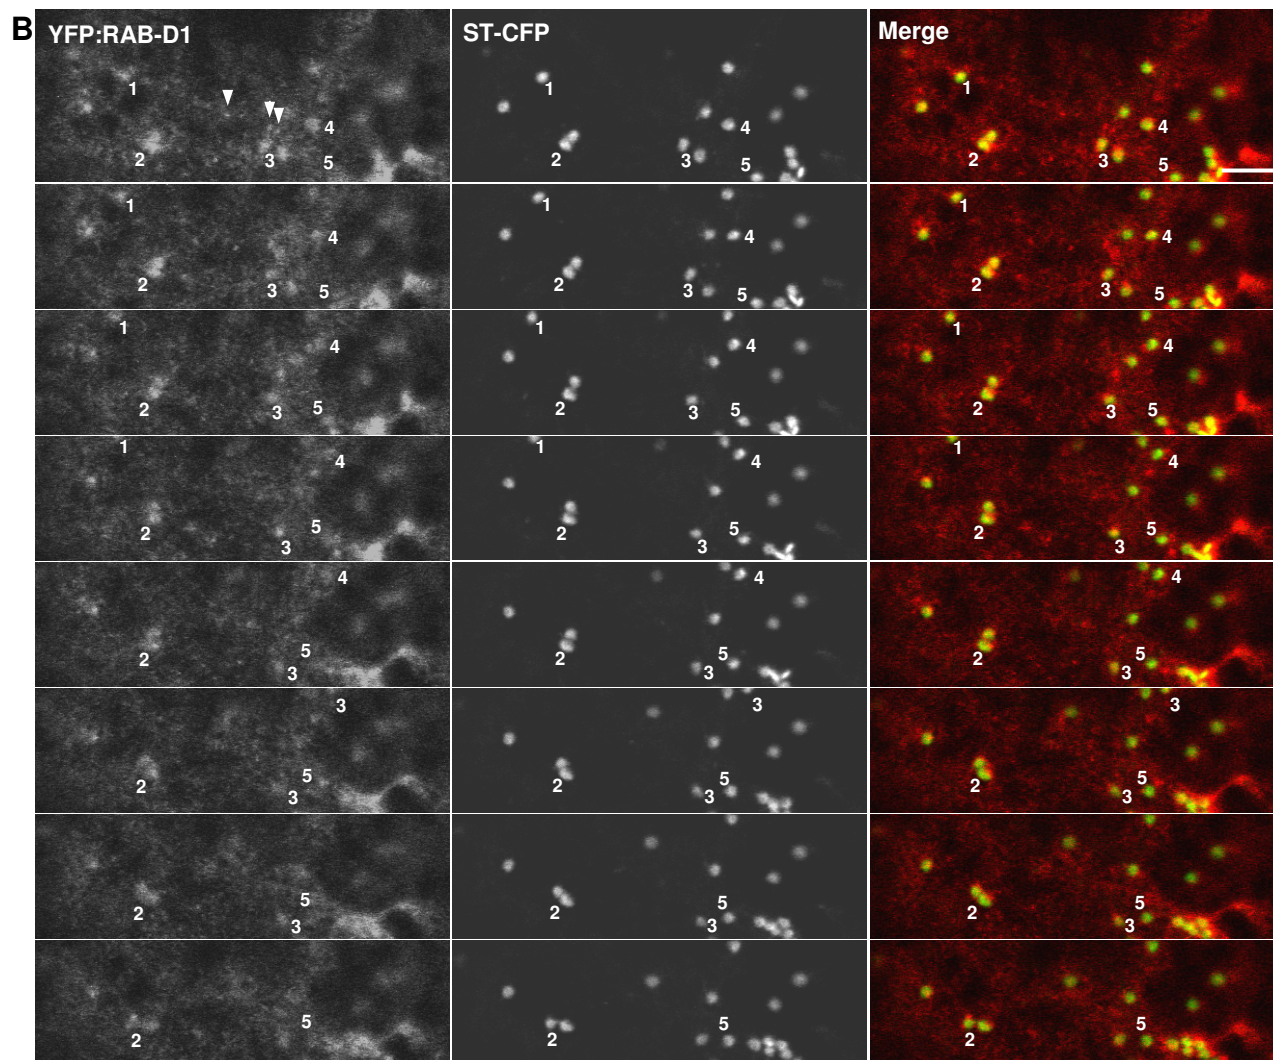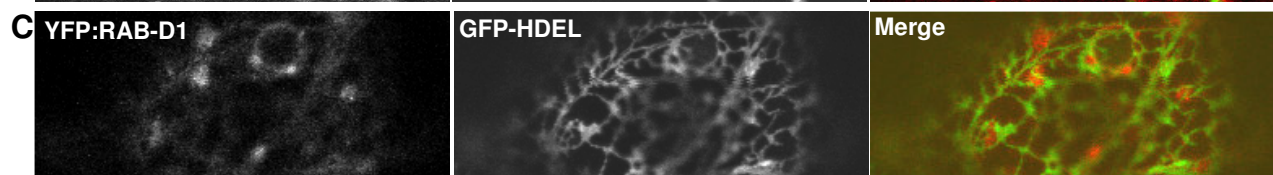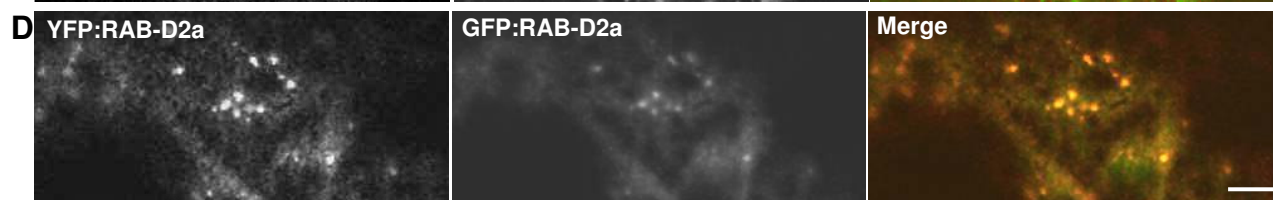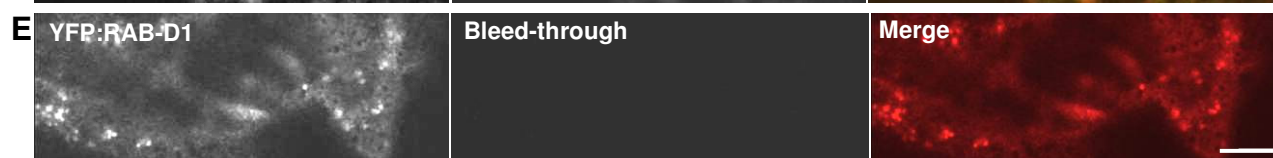

Bars = 5 μm

Supplement: supp_122_20_3749__2.pdf [file supp_122_20_3749__2.pdf]

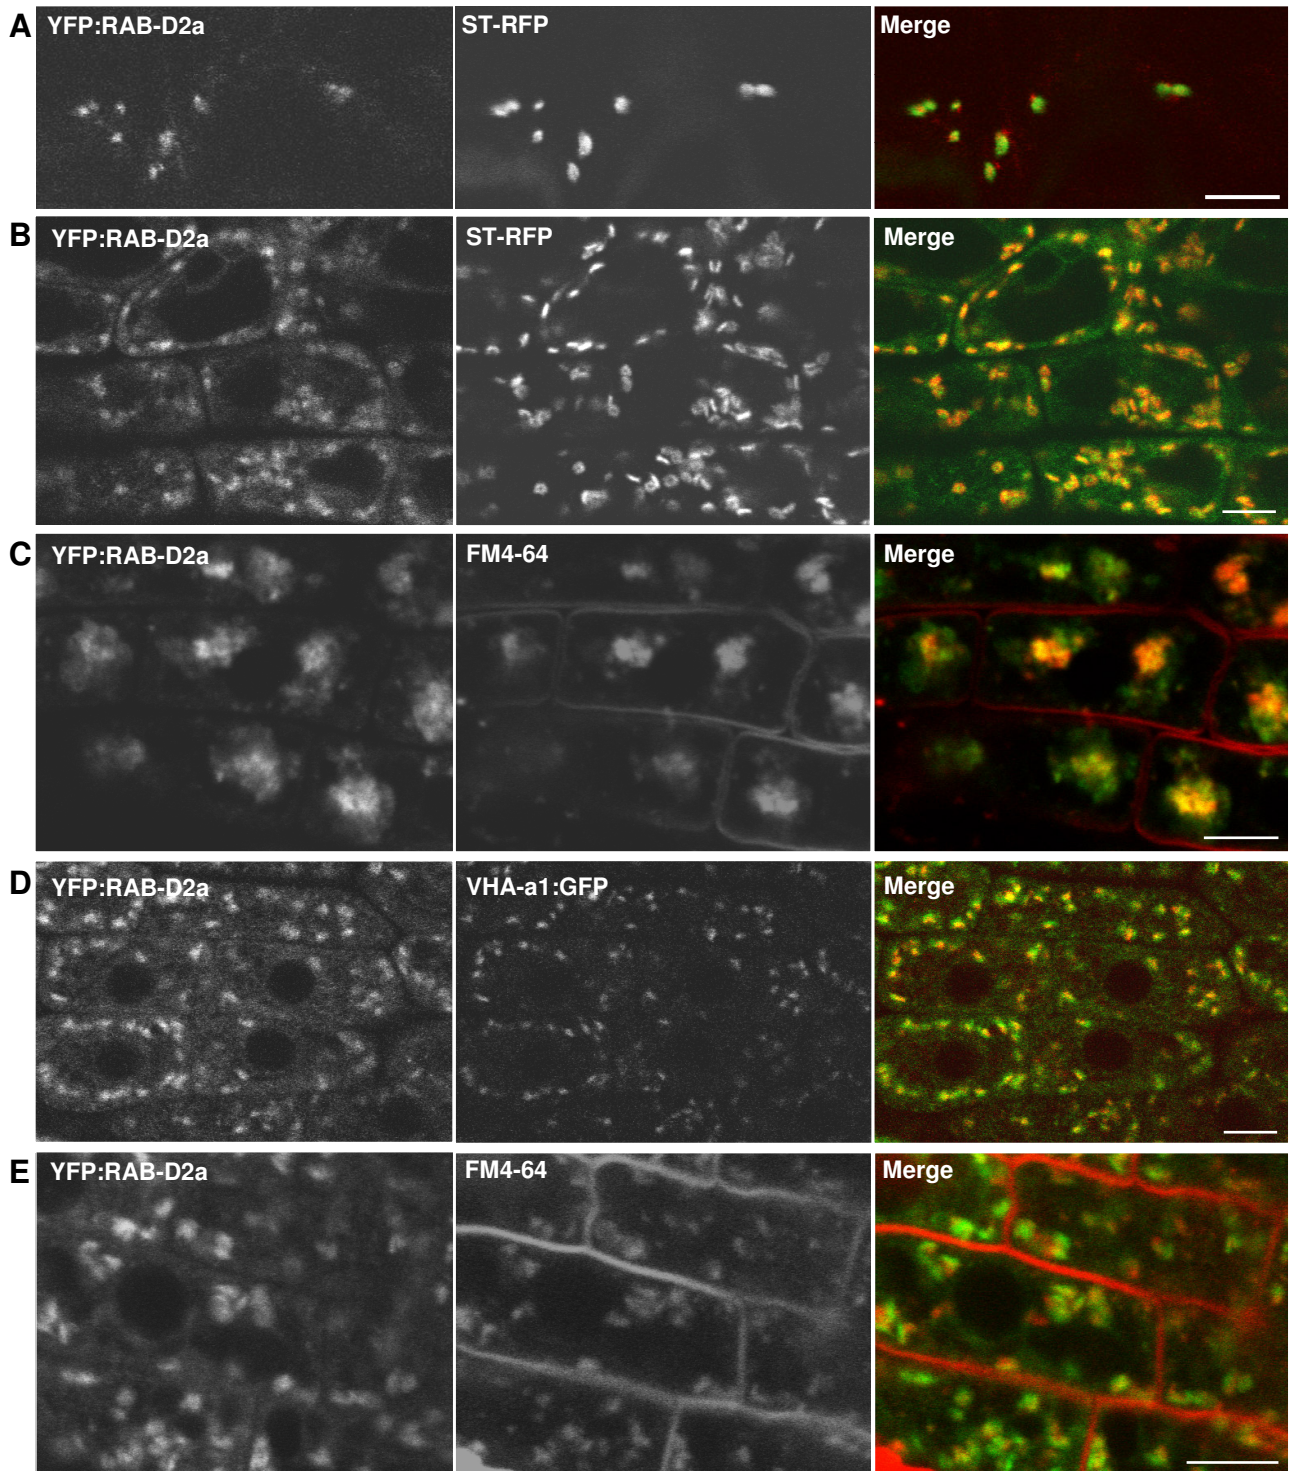

Bars = 5  $\mu$ m

Supplement: supp_122_20_3749__3.pdf [file supp_122_20_3749__3.pdf]

**A**

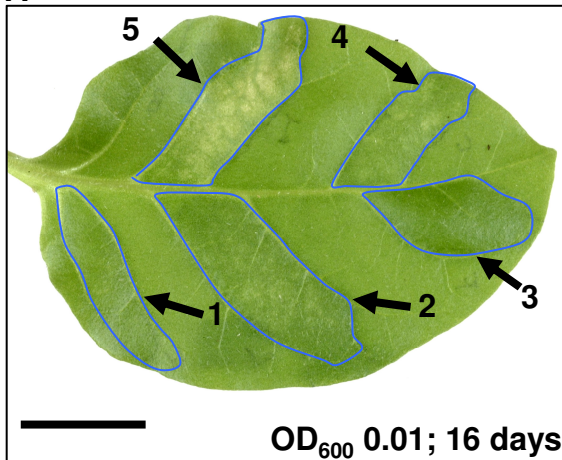

**B**

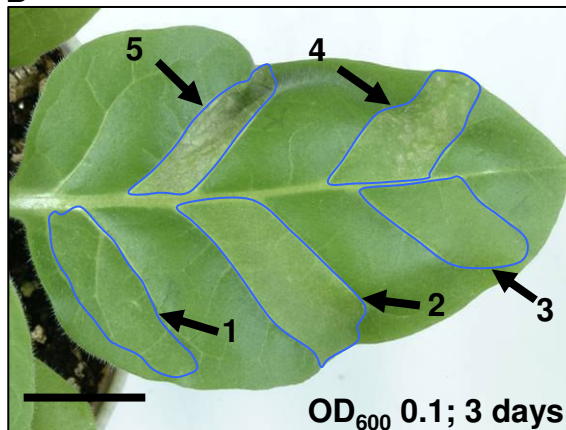

Supplement: supp_122_20_3749__4.pdf [file supp_122_20_3749__4.pdf]

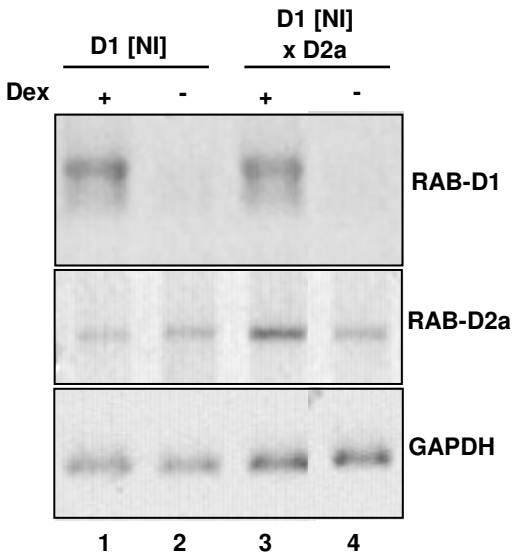

Supplement: supp_122_20_3749__5.pdf [file supp_122_20_3749__5.pdf]

**A**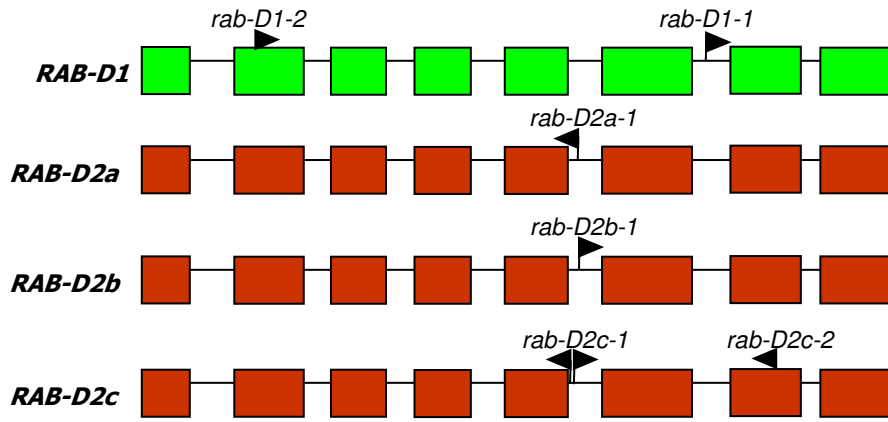**B**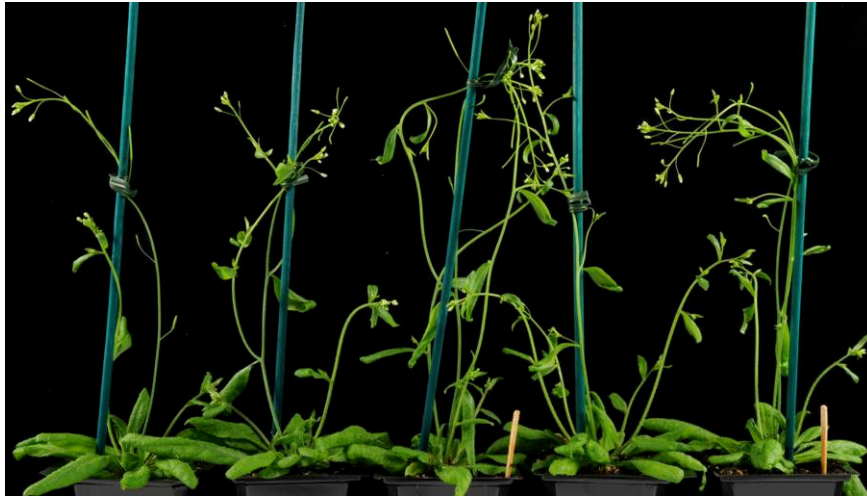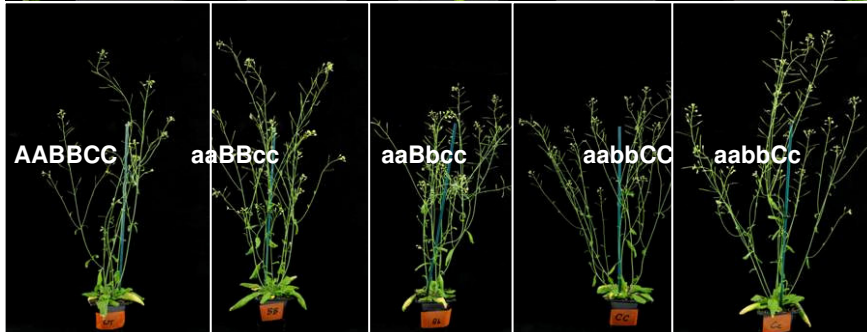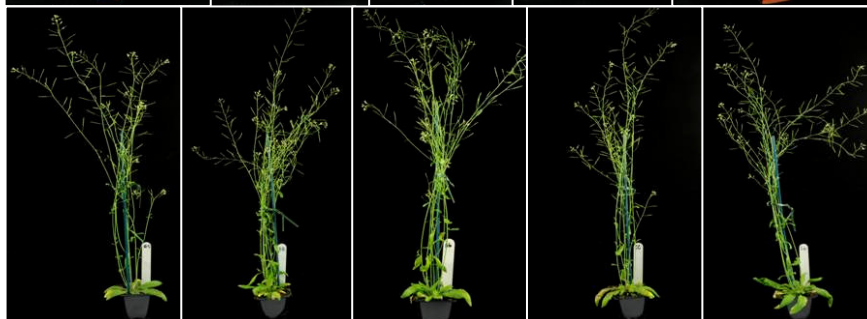

Supplement: supp_122_20_3749__6.pdf [file supp_122_20_3749__6.pdf]

**A**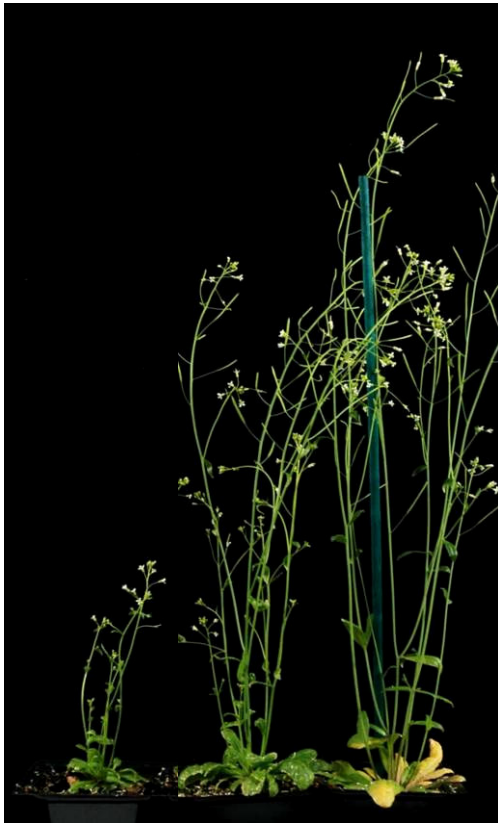

ddAAbbcc      ddAAbbcc      DDAABBCC  
 Control      +      (WT)  
 35S:*RAB-D1*  
 (11 of 19 T1 plants)

**B**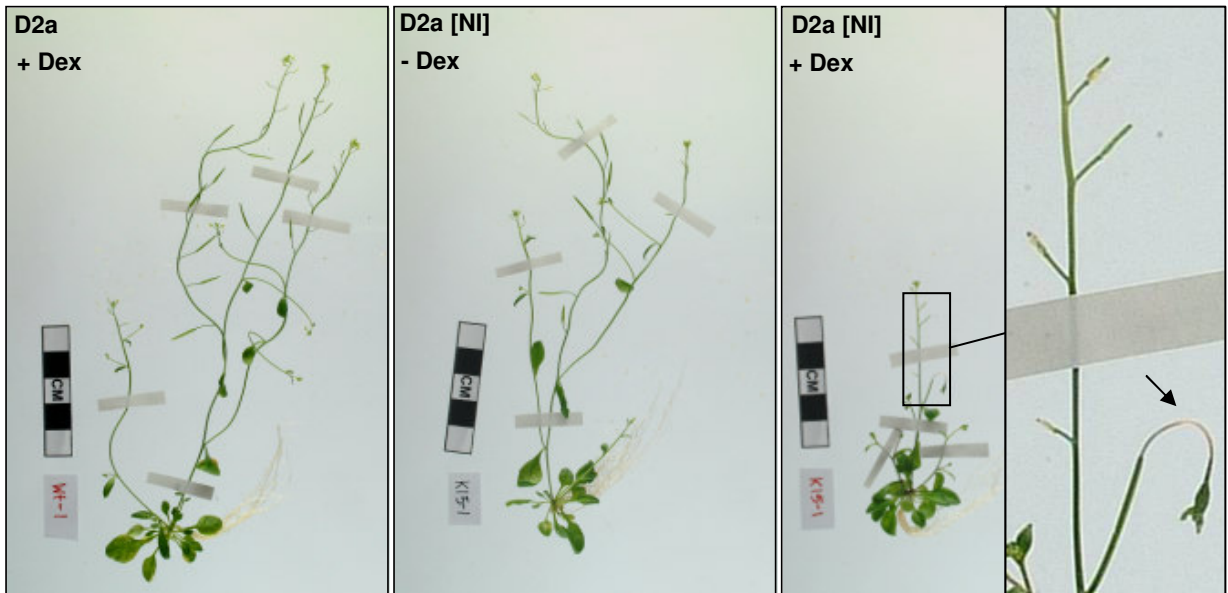

Supplement: supp_122_20_3749__7.pdf [file supp_122_20_3749__7.pdf]
